# Supplementary material for: Full Skin Equivalent Models for Simulation of Burn Wound Healing, Exploring Skin Regeneration and Cytokine Response
Source: MDPI journal article supplement (doi:10.3390/jfb14010029), 2023-01-04
Supplement: s1 [file s1]

## SUPPLEMENTARY TABLES

**Supplementary Table S1. Culture medium for cells and full skin equivalents.**

| Medium                | Contents                                                                                                                                                                                                                                                                                                                                                                                                                                                          |
|-----------------------|-------------------------------------------------------------------------------------------------------------------------------------------------------------------------------------------------------------------------------------------------------------------------------------------------------------------------------------------------------------------------------------------------------------------------------------------------------------------|
| <b>Culture medium</b> | Dulbecco's Modified Eagle's Medium (DMEM), 10% fetal calf serum (Fetalclone III, Logan, UT); 1% 200 mM glutamine, antibiotics (100 IU/mL penicillin, 100 mg/mL streptomycin; Invitrogen)                                                                                                                                                                                                                                                                          |
| <b>FSE I medium</b>   | DMEM/Ham's F12 Nutmix (3:1) (Invitrogen, Paisley, UK), 5% fetal calf serum (Fetalclone III, Logan, UT), 1 mM hydrocortisone, 1 mM isoproterenol, 0.1 mM insulin, a lipid supplement (25 mM palmitic acid, 15 mM linoleic acid, 7 mM arachidonic acid, and 24 mM bovine serum albumin) (all Sigma-Aldrich, St. Louis, MO), antibiotics (100 IU/mL penicillin, 100 mg/mL streptomycin; Invitrogen)                                                                  |
| <b>FSE II medium</b>  | DMEM/Ham's F12 Nutmix (3:1) (Invitrogen, Paisley, UK), 2% fetal calf serum (Fetalclone III, Logan, UT), 1 mM hydrocortisone, 1 mM isoproterenol, 0.1 mM insulin, 1.9 $\mu$ M DL- $\alpha$ -tocopherol, a lipid supplement (25 mM palmitic acid, 15 mM linoleic acid, 7 mM arachidonic acid, and 24 mM bovine serum albumin) (all Sigma-Aldrich, St. Louis, MO), antibiotics (100 IU/mL penicillin, 100 mg/mL streptomycin; Invitrogen)                            |
| <b>FSE III medium</b> | DMEM/Ham's F12 Nutmix (3:1) (Invitrogen, Paisley, UK), 0.5% fetal calf serum (Fetalclone III, Logan, UT), 1 mM hydrocortisone, 1 mM isoproterenol, 0.1 mM insulin, 1.9 $\mu$ M DL- $\alpha$ -tocopherol, 130 mg/mL ascorbic acid, a lipid supplement (25 mM palmitic acid, 15 mM linoleic acid, 7 mM arachidonic acid, and 24 mM bovine serum albumin) (all Sigma-Aldrich, St. Louis, MO), antibiotics (100 IU/mL penicillin, 100 mg/mL streptomycin; Invitrogen) |

**Supplementary Table S2. Antibodies used for immunohistochemistry.**

| Primary antibody                     | Clone      | Host   | Dilution | Manufacturer   | Antigen retrieval |
|--------------------------------------|------------|--------|----------|----------------|-------------------|
| <b>Pan-cytokeratin</b>               | PCK-26     | Mouse  | 1:200    | Sigma          | Triton            |
| <b>Cytokeratin 10</b>                | Polyclonal | Rabbit | 1:5000   | Abcam          | Citrate           |
| <b>Cytokeratin 15</b>                | EPR1614Y   | Mouse  | 1:200    | Abcam          | Citrate           |
| <b>Cytokeratin 17</b>                | E3         | Mouse  | 1:500    | DAKO           | Citrate           |
| <b>Involucrin</b>                    | SY5        | Mouse  | 1:250    | Novocastra     | Triton            |
| <b>Collagen IV</b>                   | CIV 22     | Mouse  | 1:100    | DAKO           | Triton            |
| <b>Laminin <math>\alpha</math> 5</b> | 4C7        | Mouse  | 1:200    | DAKO           | Triton            |
| <b>Vimentin</b>                      | V9         | Mouse  | 1:1000   | DAKO           | Triton            |
| <b><math>\alpha</math>-SMA</b>       | 1A4        | Mouse  | 1:500    | DAKO           | Tris/EDTA         |
| <b>Ki67</b>                          | MIB1       | Mouse  | 1:100    | DAKO           | Tris/EDTA         |
| <b>BrdU</b>                          | IIB5       | Mouse  | 1:200    | MP Biomedicals | HCl/Borax         |

## SUPPLEMENTARY FIGURES

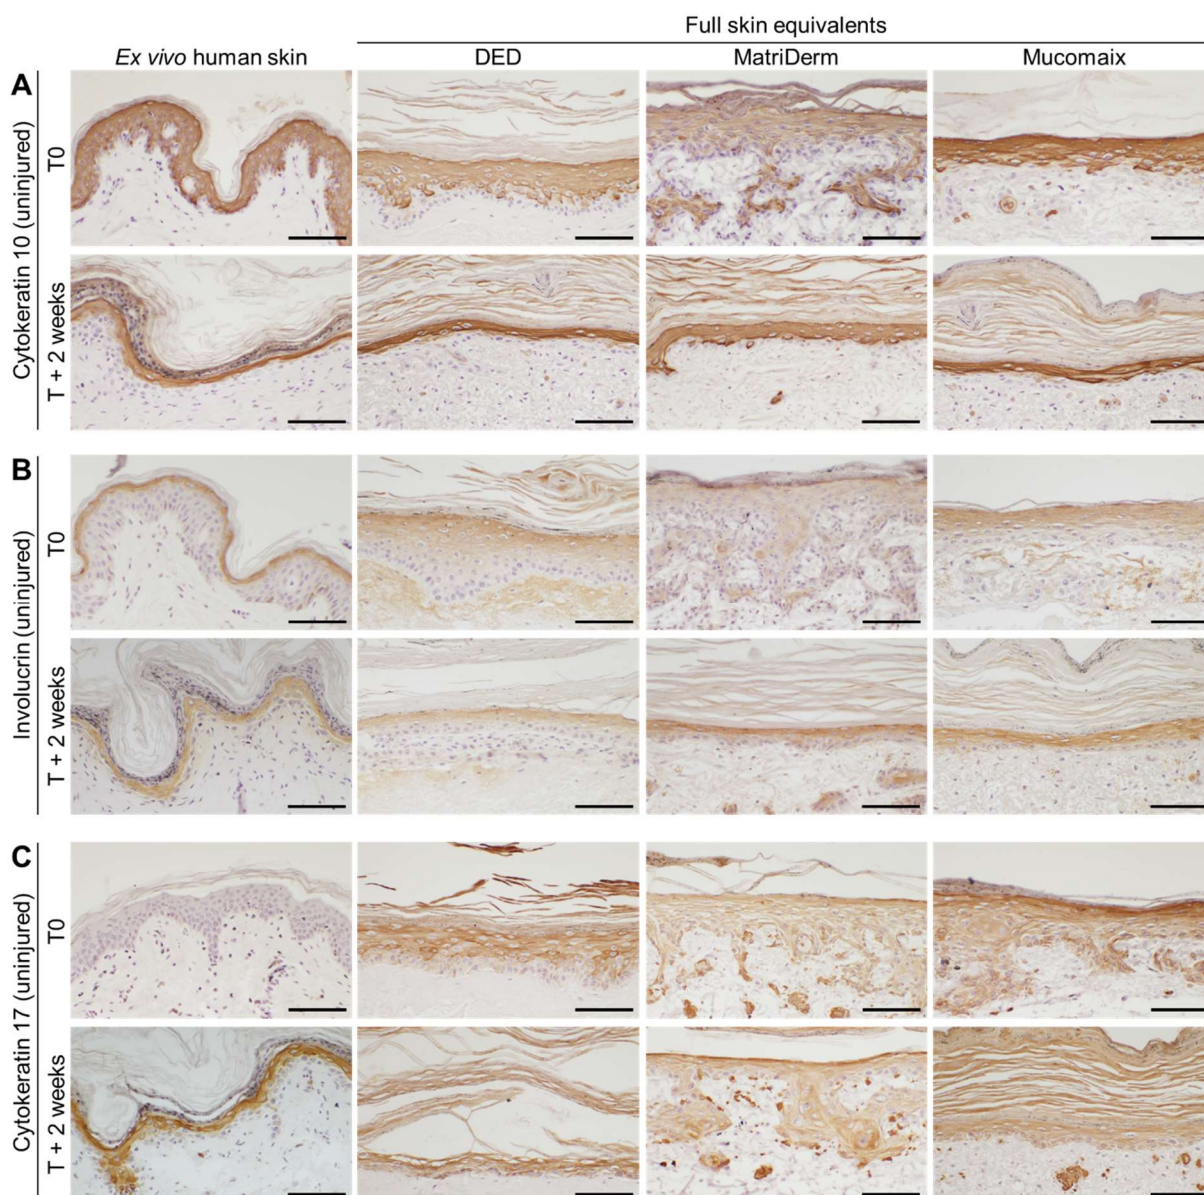

**Supplementary Figure S1. Microscopic images of cytokeratin 10, involucrin and cytokeratin 17 in cultured skin models.** Ex vivo human skin (left) and full skin equivalents generated from de-epidermalized dermis, MatriDerm and Mucomaix (right). Immunohistochemical **(A)** cytokeratin 10; **(B)** involucrin; **(C)** cytokeratin 17 DAB staining. Models were produced from 3 different skin donors in duplicate. For the full skin equivalent models, day 0 was after the initial 3 weeks of culture. Black scale bar = 100  $\mu$ m.

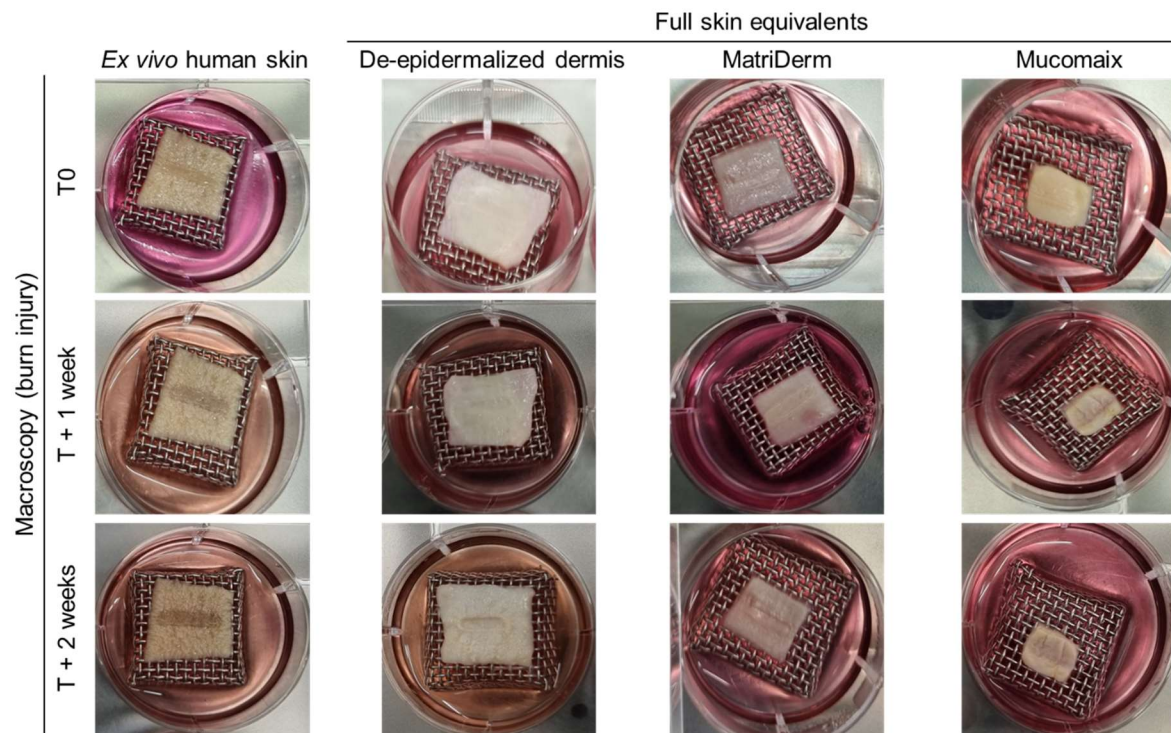

**Supplementary Figure S2. Macroscopic images of burn-injured skin models.** *Ex vivo* human skin (left) and full skin equivalents generated from de-epidermalized dermis, MatriDerm and Mucomaix (right). Models were produced from 3 different skin donors in duplicate. For the full skin equivalent models, day 0 was after the initial 3 weeks of culture.

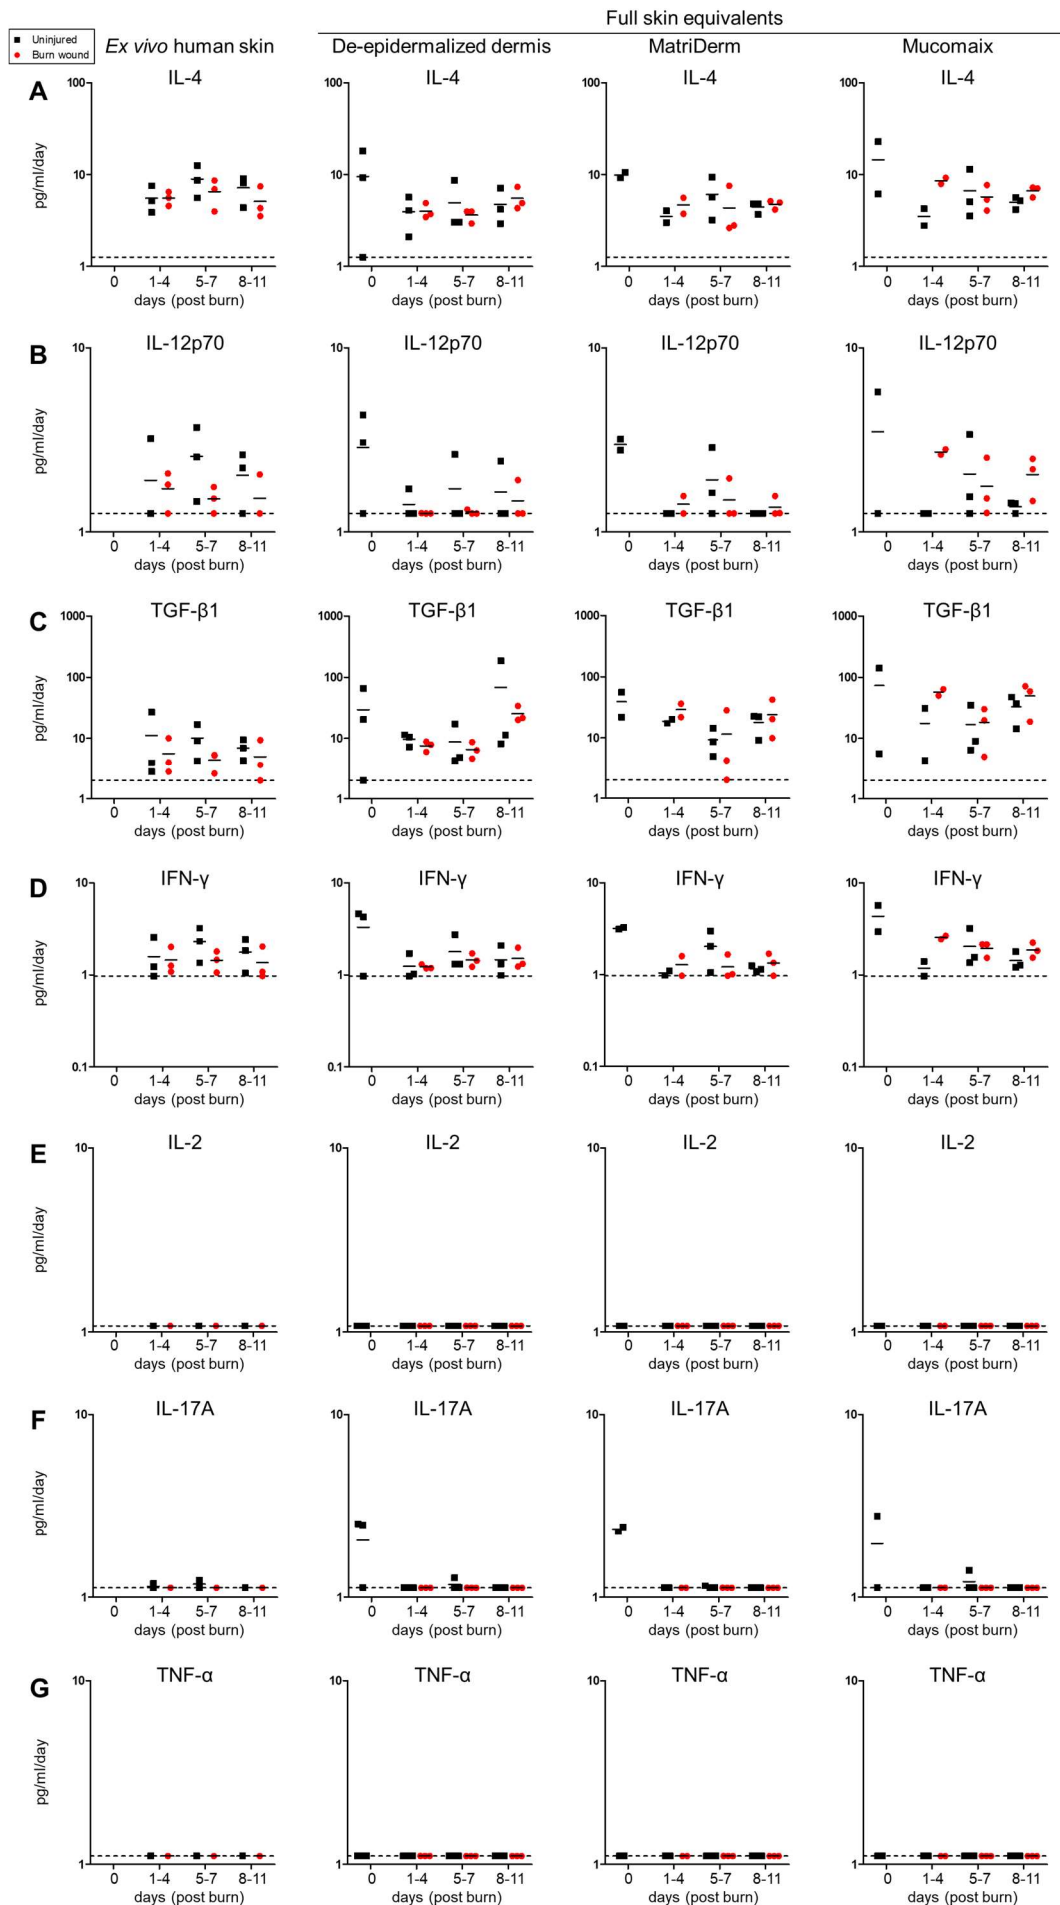

**Supplementary Figure S3. Cytokines detected in culture medium of burn-injured and uninjured skin models.**

*Ex vivo* human skin (left) and full skin equivalents generated from de-epidermalized dermis, MatriDerm and Mucomaix (right). Level of (A) IL-4; (B) IL-12p70; (C) TGF- $\beta$ 1; (D) IFN- $\gamma$ ; (E) IL-2; (F) IL-17A; (G) TNF- $\alpha$  in the culture medium at T0, T + 1-4, T + 5-7 and T + 8-11 days (after burn injury). Samples from biological duplicates were pooled per donor (n = 3 donors) and re-calculated into pg/ml per day of culture to compensate for intermittent medium changes. Striped line indicates the highest or lowest level of quantification. Because *ex vivo* human skin models were started at T0, no levels are shown for day 0. For the full skin equivalent models, day 0 was after the initial 3 weeks of culture.
